# Supplementary material for: The Antioxidant and Anti-Inflammatory Effects of the Main Carotenoids from Tomatoes via Nrf2 and NF-κB Signaling Pathways
Source: MDPI journal article supplement (doi:10.3390/nu15214652), 2023-11-02
Supplement: s1 [file s1]

# Supplementary Materials

**Table S1.** Primer sequence of target gene

| Target gene    | Primer sequence                                                       |
|----------------|-----------------------------------------------------------------------|
| Nrf2           | Forward AAGCACAGCCAGCACATTCTCC<br>Reverse TGACCAGGACTCACGGGAAGCTTC    |
| HO-1           | Forward TGGGTTCTGCTTGTTTCGCTCTATC<br>Reverse CAGGTGTCCAGGGAAGGCTTTAAG |
| NF- $\kappa$ B | Forward TGTGGTGGAGGACTTGCTGAGG<br>Reverse AGTGCTGCCTTGCTGTTCTTGAG     |
| TGF- $\beta$ 1 | Forward CTGGCACTGCTTCCCGAATGTC<br>Reverse GACCGCAACAACGCAATCTATGAC    |
| $\beta$ -actin | Forward GCTGTGCTATGTTGCCCTAGACTTC<br>Reverse GGAACCGCTCATTGCCGATAGTG  |

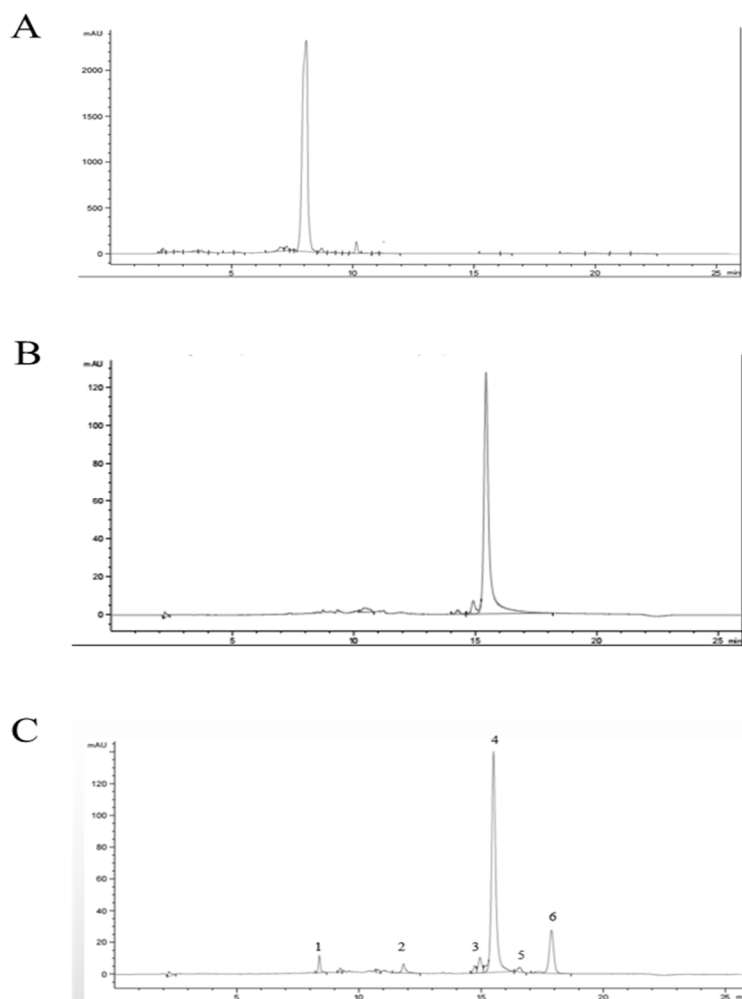

**Figure S1.** HPLC-VWD chromatogram at 450 nm of lutein (A), lycopene (B) and tomato extract (C).

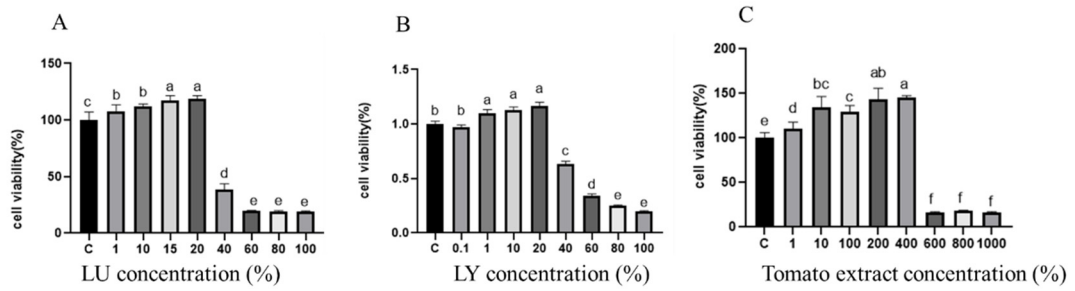

**Figure S2.** The viability effect of lutein, lycopene and tomato extract on H9c2 cells. A is the effect of different concentrations of lutein on H9c2 cell viability. B is the effect of different concentrations of lycopene on H9c2 cell viability. C is the effect of different concentrations of tomato extract on H9c2 cell viability. The horizontal coordinate C indicates the control group. Different letters (a, b, c, d, e, f) indicate significant differences between groups ( $p < 0.05$ ).
